# Supplementary material for: Efficacy of an orally administered anti‐diarrheal probiotic paste (Pro‐Kolin Advanced) in dogs with acute diarrhea: A randomized, placebo‐controlled, double‐blinded clinical study
Source: PubMed Central journal article supplement — J Vet Intern Med. 2019 Mar 18;33(3):1286–94. doi: 10.1111/jvim.15481 (PMC6524086; doi:10.1111/jvim.15481), 2019-03-18
Supplement: JVIM-33-1286-s001.pdf [file JVIM-33-1286-s001.pdf]

## S1: Inclusion and exclusion criteria

| Inclusion criteria                                                                                                                                                                                                                                                                                                                                                                                                                                                                                                                                                                                                                                                                                                                                                    | Exclusion criteria                                                                                                                                                                                                                                                                                                                                                                                                                                                                                                                                                                                                                                                                                                                                                                                                                                                                               |
|-----------------------------------------------------------------------------------------------------------------------------------------------------------------------------------------------------------------------------------------------------------------------------------------------------------------------------------------------------------------------------------------------------------------------------------------------------------------------------------------------------------------------------------------------------------------------------------------------------------------------------------------------------------------------------------------------------------------------------------------------------------------------|--------------------------------------------------------------------------------------------------------------------------------------------------------------------------------------------------------------------------------------------------------------------------------------------------------------------------------------------------------------------------------------------------------------------------------------------------------------------------------------------------------------------------------------------------------------------------------------------------------------------------------------------------------------------------------------------------------------------------------------------------------------------------------------------------------------------------------------------------------------------------------------------------|
| <ul style="list-style-type: none"> <li>• Animals with acute diarrhea with an owner reported fecal score of 5 or 6 on one or more occasion in the 24hours before presenting to the vet</li> <li>• Animals with a general condition, which requires only dietary management and the administration of the feed supplement</li> <li>• No antimicrobial treatment at least 4 weeks before day 0</li> <li>• No probiotic products at least 4 weeks before day 0</li> <li>• Animals must be suitable for the study when examined physically on Day 0 with respect to being in good general health and bodily condition and amenable to examination</li> <li>• The owner or authorised agent has given the consent for his/her animal to participate in the study</li> </ul> | <ul style="list-style-type: none"> <li>• Animals showing acute diarrhea which will need additional treatment other than the feed supplement</li> <li>• Animals with on-going vomiting which requires medical treatment or temporary starvation</li> <li>• Animals with diarrhea which is present for more than 7 days before enrolment</li> <li>• Animals with known hypersensitivity to the active ingredients and/or excipients of the feed supplement/placebo</li> <li>• Animals which received antimicrobial treatment less than 4 weeks before day 0</li> <li>• Animals which received probiotic products less than 4 weeks before day 0</li> <li>• Animals with pre-existing medical and /or surgical conditions where symptoms may include diarrhea or vomiting</li> <li>• Animals with diarrhea known to be secondary to other underlying diseases (e.g. endocrine disorders)</li> </ul> |

| <b>Criteria for inclusion in analysis</b>                                                                                                                                                                                                                                                                                                                  | <b>Post-inclusion removal criteria</b>                                                                                                                                                                                                                                                                                                                                                                                                                                                                                                                                                                                                                                                                                                                                                   |
|------------------------------------------------------------------------------------------------------------------------------------------------------------------------------------------------------------------------------------------------------------------------------------------------------------------------------------------------------------|------------------------------------------------------------------------------------------------------------------------------------------------------------------------------------------------------------------------------------------------------------------------------------------------------------------------------------------------------------------------------------------------------------------------------------------------------------------------------------------------------------------------------------------------------------------------------------------------------------------------------------------------------------------------------------------------------------------------------------------------------------------------------------------|
| <ul style="list-style-type: none"> <li>• Received at least two doses of ADPP or placebo every full day on the study up to study completion</li> <li>• Received the study diet</li> <li>• Had a fecal score of 4, 5 or 6 whilst on the study</li> <li>• Did not receive treatment with any non-study products that had gastrointestinal activity</li> </ul> | <ul style="list-style-type: none"> <li>• Removal due to worsening or not-improvement related to the condition under investigation.</li> <li>• Removals due to concomitant disease not allowing the animal to stay on study (e.g. other treatments needed not compliant with protocol).</li> <li>• Animal's death.</li> <li>• Animal owner's refusal to continue study participation.</li> <li>• Administration of a non-approved concurrent therapy, which may affect the integrity of the study data.</li> <li>• Incorrect test product/placebo administration (e.g. serious dosing error)</li> <li>• Meeting an exclusion criterion and/or not meeting an inclusion criterion</li> <li>• Other deviations that may affect the integrity of the study data must be specified</li> </ul> |

**S2: Composition of the ADPP and placebo and dosage****ADPP:**

|                                                         |                                                                                                                                                                                                                         |
|---------------------------------------------------------|-------------------------------------------------------------------------------------------------------------------------------------------------------------------------------------------------------------------------|
| Name                                                    | Pro-Kolin Advanced                                                                                                                                                                                                      |
| Microbial content:                                      | <i>Enterococcus faecium</i> 4b1707                                                                                                                                                                                      |
| Qualitative and quantitative composition:               | Active ingredients:<br><i>Enterococcus faecium</i> 4b1707 $2 \times 10^8$ CFU/g,<br>Preplex <sup>®</sup> prebiotic, combined kaolin and<br>montmorillonite clay, psyllium husk, pectin, beta<br>glucan<br>liver flavour |
| Formulation:                                            | Paste                                                                                                                                                                                                                   |
| Nature and composition of immediate packaging:          | 30 ml syringe                                                                                                                                                                                                           |
| Sponsor (Marketing authorization holder):               | Probiotics International Ltd                                                                                                                                                                                            |
| Marketing authorisation holder & manufacturing company: | Probiotics International Ltd                                                                                                                                                                                            |

**Placebo:**

|                                                         |                                                     |
|---------------------------------------------------------|-----------------------------------------------------|
| Name                                                    | Placebo                                             |
| Microbial Content:                                      | N/A                                                 |
| Qualitative and quantitative composition:               | Soya Oil, Colloidal silica, Dextrose, Liver Flavour |
| Formulation:                                            | Paste                                               |
| Nature and composition of immediate packaging:          | 30 ml syringe                                       |
| Marketing authorisation holder & manufacturing company: | Probiotics International Ltd                        |

**Dosage instructions for ADPP and placebo:**

| <b>Bodyweight (kg)</b> | <b>Dosage volume (ml)</b> | <b>Frequency</b> |
|------------------------|---------------------------|------------------|
| <5                     | 2                         | 3 times daily    |
| 5 to <15               | 3                         | 3 times daily    |
| 15 to <30              | 5                         | 3 times daily    |
| 30 to <45              | 7                         | 3 times daily    |
| ≥ 45                   | 10                        | 3 times daily    |

### S3: Fecal Scoring Chart

|                    |                                                                                                             |                                                                                      |  |
|--------------------|-------------------------------------------------------------------------------------------------------------|--------------------------------------------------------------------------------------|--|
| Score1=hard        | Hardorfirm,shouldbepliable, segmentedappearance,little or no residueleftongroundwhen pickedup               |    |  |
| Score2=log-like    | Littleornosegmentationvisible, moistsurface,leavesresiduebut holdsformifpickedup                            |    |  |
| Score3=moist       | Moistbutdistinctlogshape visible,leavesresidueandloses abitofformifpickedup(normal for somedogs)            |    |  |
| Score4=very moist  | Verymoistbuthasdistinctshape, presentinpilesratherthan distinct logs, leavesresidueand loses formifpickedup |    |  |
| Score5=has texture | Hastexture,butnodefined shape,occursaspilesorasspot, leavesresiduewhenpickedup                              |   |  |
| Score6=watery      | Watery,notexture,flat,occursas puddles                                                                      |  |  |

### S4: Concomitant Treatments

- lithium bromide (epilepsy)
- immunotherapy (atopy)
- tramadol (pain)
- topical fusidic acid/ betamethasone (moist dermatitis)
- pimobendan (cardiac insufficiency)
- phenobarbitone (epilepsy)
- topical diethanolamine fusidate/ framycetin sulfate/ nystatin/ prednisolone (otitis externa)
- topical fusidic acid (conjunctivitis)
